# Supplementary material
Source: Research Square preprint supplement (doi:10.21203/rs.3.rs-8667584/v1)
Supplement: Supplementary file 1 [file aa2cb8d5e85bc50007f42082.xlsx]

## Sheet: 编码数据_版本2_生成自然对数(Ln)变量
province	id	Treated	dt	year	L.NQP	NQP	CI	Urbanization rate	Economic development	Financial support	Tax burden	Population density	GTFP_SML	Green technology innovation
安徽	1	1	0	2011	-2.12166	-2.12166	0.802898	-0.803634	10.2148	-1.59541	-2.6874	6.05507	0.0194931	6.51026
安徽	1	1	0	2012	-2.04877	-2.04877	0.716375	-0.764046	10.3319	-1.53268	-2.6429	6.05607	0.00750033	6.95273
安徽	1	1	0	2013	-1.9512	-1.9512	0.688135	-0.729935	10.4459	-1.55441	-2.60566	6.05774	0.00417989	7.28001
安徽	1	1	0	2014	-1.86306	-1.86306	0.640274	-0.69607	10.5342	-1.57449	-2.58817	6.05924	0.00402077	7.7411
安徽	1	1	0	2015	-1.76508	-1.76508	0.587787	-0.661376	10.5889	-1.51486	-2.58327	6.06158	0.00665101	8.25271
安徽	1	1	1	2016	-1.72322	-1.72322	0.483043	-0.627459	10.6848	-1.56095	-2.65061	6.06523	0.00660278	8.74289
安徽	1	1	1	2017	-1.75424	-1.75424	0.415415	-0.593509	10.8015	-1.56518	-2.71197	6.0692	0.00655455	8.90259
安徽	1	1	1	2018	-1.78902	-1.78902	0.348542	-0.563367	10.9342	-1.64384	-2.74702	6.07233	0.00928663	9.1644
安徽	1	1	1	2019	-1.61948	-1.61948	0.142367	-0.53924	11.0114	-1.60631	-2.81386	6.07496	0.0123938	8.69935
安徽	1	1	1	2020	-1.06511	-1.67348	-1.19402	-0.539446	11.0415	-1.62783	-2.85096	6.07705	0.0154913	8.8922
北京	2	1	0	2011	-1.03967	-1.06511	-0.228156	-0.148452	11.365	-1.66707	-1.79532	7.11804	0.206223	8.388
北京	2	1	0	2012	-1.02386	-1.03967	-0.307885	-0.147442	11.4377	-1.64139	-1.80639	7.14422	0.224613	8.5637
北京	2	1	0	2013	-0.982591	-1.02386	-0.494296	-0.146316	11.5186	-1.62212	-1.79401	7.16702	0.242671	8.92891
北京	2	1	0	2014	-0.939387	-0.982591	-0.53273	-0.145027	11.5781	-1.62273	-1.78127	7.18829	0.260408	9.14045
北京	2	1	0	2015	-0.88079	-0.939387	-0.638659	-0.142588	11.6412	-1.46294	-1.75981	7.19618	0.277836	9.27472
北京	2	1	1	2016	-0.8763	-0.88079	-0.802962	-0.141987	11.7231	-1.44001	-1.80379	7.19942	0.294966	9.39682
北京	2	1	1	2017	-0.918532	-0.8763	-0.908819	-0.14001	11.8217	-1.47677	-1.8547	7.19897	0.311807	9.54467
北京	2	1	1	2018	-0.829825	-0.918532	-0.962335	-0.138203	11.9248	-1.48863	-1.89251	7.19774	0.328369	9.75441
北京	2	1	1	2019	-1.82945	-0.829825	-1.12086	-0.135222	11.994	-1.5654	-1.99459	7.19701	0.344662	9.78869
北京	2	1	1	2020	-1.77419	-0.856213	-1.33181	-0.133138	12.0086	-1.61957	-2.04639	7.19665	0.360693	9.89212
福建	3	1	0	2011	-1.74985	-1.82945	0.390013	-0.542779	10.7774	-2.09816	-2.6592	5.72084	0.00319316	6.22654
福建	3	1	0	2012	-1.66155	-1.77419	0.267734	-0.522435	10.8773	-2.04683	-2.64035	5.73579	-0.00255241	6.50279
福建	3	1	0	2013	-1.57742	-1.74985	0.144966	-0.497614	10.9726	-1.9924	-2.56945	5.74718	-0.0083312	6.6733
福建	3	1	0	2014	-1.54776	-1.66155	0.181488	-0.477995	11.0621	-2.02061	-2.57801	5.76251	-0.0141436	6.85961
福建	3	1	0	2015	-1.58881	-1.57742	0.064851	-0.458424	11.1221	-1.90244	-2.6271	5.77235	0.00659381	7.33694
福建	3	1	1	2016	-1.64164	-1.54776	-0.102033	-0.440174	11.2121	-1.93522	-2.71376	5.78035	0.00432625	7.65255
福建	3	1	1	2017	-1.61575	-1.58881	-0.160169	-0.418838	11.3357	-1.97753	-2.80259	5.79247	0.00205354	7.91096
福建	3	1	1	2018	-2.91057	-1.64164	-0.166055	-0.400725	11.4587	-2.08012	-2.8502	5.80202	0.00436566	8.17892
福建	3	1	1	2019	-2.91006	-1.61575	-0.271809	-0.38757	11.5398	-2.12051	-2.95288	5.81003	0.00627917	8.00503
福建	3	1	1	2020	-2.7432	-1.6397	-1.06421	-0.374798	11.5627	-2.1235	-2.99377	5.81592	0.00609183	8.15133
甘肃	4	1	0	2011	-2.6006	-2.91057	1.37725	-0.987623	9.84404	-0.989231	-2.83078	4.09301	-0.0219851	5.2575
甘肃	4	1	0	2012	-2.35704	-2.91006	1.28868	-0.947205	9.95898	-0.962632	-2.74131	4.09223	0.00128799	5.49717
甘肃	4	1	0	2013	-1.95529	-2.7432	1.20836	-0.90434	10.071	-0.957095	-2.66711	4.08712	0.000692649	5.45104
甘肃	4	1	0	2014	-1.78127	-2.6006	1.13879	-0.860825	10.1552	-0.941877	-2.58745	4.08475	0.00458925	5.77765
甘肃	4	1	0	2015	-1.73228	-2.35704	1.11219	-0.815465	10.1638	-0.795846	-2.51574	4.08158	0.000913781	5.9162
甘肃	4	1	1	2016	-1.59657	-1.95529	1.01487	-0.774969	10.2182	-0.785255	-2.57512	4.08039	0.0136223	5.97126
甘肃	4	1	1	2017	-0.565062	-1.78127	0.988053	-0.731445	10.2786	-0.797628	-2.59594	4.08119	0.00142637	6.25767
甘肃	4	1	1	2018	-0.509584	-1.73228	0.934524	-0.699337	10.379	-0.7647	-2.58589	4.07841	0.00230637	6.34212
甘肃	4	1	1	2019	-0.466005	-1.59657	0.891178	-0.679239	10.4547	-0.791304	-2.71374	4.07602	0.00346834	6.41673
甘肃	4	1	1	2020	-0.38596	-1.78419	-0.0576291	-0.649311	10.487	-0.768631	-2.76072	4.07263	0.00451283	6.42972
广东	5	1	0	2011	-0.312298	-0.565062	0.178146	-0.406916	10.8213	-2.06771	-2.45683	6.39396	0.00446707	8.06306
广东	5	1	0	2012	-0.186748	-0.509584	0.0806579	-0.398241	10.8649	-2.04335	-2.41908	6.42011	0.00565002	8.3483
广东	5	1	0	2013	-0.178386	-0.466005	0.00796817	-0.38434	10.9336	-2.00568	-2.38291	6.44064	0.00336245	8.61123
广东	5	1	0	2014	-0.178639	-0.38596	-0.0672087	-0.376586	11.0006	-2.00801	-2.34864	6.45989	0.00314719	8.6871
广东	5	1	0	2015	-0.131488	-0.312298	-0.12897	-0.363699	11.0747	-1.7623	-2.31554	6.4762	0.00398783	9.00712
广东	5	1	1	2016	-2.73013	-0.186748	-0.200893	-0.354535	11.1515	-1.81002	-2.31701	6.49571	0.00375428	9.45438
广东	5	1	1	2017	-2.66531	-0.178386	-0.258771	-0.346159	11.2414	-1.80742	-2.33508	6.51508	0.00352068	9.77001
广东	5	1	1	2018	-2.63671	-0.178639	-0.307885	-0.331146	11.3099	-1.8491	-2.32864	6.53199	0.00231701	10.0346
广东	5	1	1	2019	-2.59729	-0.131488	-0.417032	-0.319517	11.3732	-1.83143	-2.37305	6.54334	0.00262649	9.96077
广东	5	1	1	2020	-2.51375	-0.207931	-1.00786	-0.299049	11.391	-1.85266	-2.42019	6.55406	0.00322557	10.041
广西	6	1	0	2011	-2.51326	-2.73013	0.591668	-0.870113	10.0094	-1.3979	-2.77095	5.27769	0.00332643	5.50939
广西	6	1	0	2012	-2.55721	-2.66531	0.578858	-0.832845	10.0933	-1.33144	-2.69633	5.28604	0.00893271	6.42325
广西	6	1	0	2013	-2.52247	-2.63671	0.481191	-0.796138	10.1817	-1.35573	-2.65427	5.29389	0.00485981	6.90475
广西	6	1	0	2014	-2.42021	-2.59729	0.392718	-0.764839	10.2613	-1.3622	-2.63135	5.3021	0.0056219	7.34859
广西	6	1	0	2015	-2.81995	-2.51375	0.260054	-0.73409	10.3382	-1.29194	-2.66332	5.31066	0.00482114	7.59488
广西	6	1	1	2016	-2.75579	-2.51326	0.212689	-0.708291	10.4145	-1.28881	-2.74427	5.32017	0.00341605	7.94165
广西	6	1	1	2017	-2.59959	-2.55721	0.257738	-0.681598	10.5034	-1.2877	-2.82259	5.33041	0.00200898	7.94165
广西	6	1	1	2018	-2.46749	-2.52247	0.212689	-0.657213	10.5926	-1.30722	-2.86176	5.33853	0.000599927	7.53476
广西	6	1	1	2019	-2.27642	-2.42021	0.226338	-0.635431	10.6638	-1.28915	-2.91879	5.34558	-0.00216052	7.1507
广西	6	1	1	2020	-2.04537	-2.27907	-0.683197	-0.612352	10.6973	-1.27529	-2.98926	5.35293	0.00019262	7.36138
贵州	7	1	0	2011	-2.1164	-2.81995	1.50585	-1.04896	9.68183	-0.914876	-2.38305	5.30002	-0.0475478	5.04343
贵州	7	1	0	2012	-2.39873	-2.75579	1.41221	-1.01335	9.84939	-0.894728	-2.29161	5.31604	-0.000917522	5.60212
贵州	7	1	0	2013	-2.41816	-2.59959	1.28398	-0.970486	10.0028	-0.950275	-2.25082	5.3285	0.0050235	5.68358
贵州	7	1	0	2014	-2.80164	-2.46749	1.11317	-0.910312	10.1307	-0.951361	-2.18993	5.34082	0.00394841	6.2186
贵州	7	1	0	2015	-2.86522	-2.27642	0.988797	-0.844899	10.2593	-0.984219	-2.23657	5.34921	0.00382088	6.20456
贵州	7	1	1	2016	-2.76676	-2.04537	0.920681	-0.786143	10.3606	-1.01763	-2.35373	5.36261	0.00857454	6.41017
贵州	7	1	1	2017	-2.71628	-2.1164	0.786638	-0.738983	10.491	-1.08169	-2.44518	5.37451	0.00787615	6.76041
贵州	7	1	1	2018	-2.58312	-2.39873	0.615726	-0.702389	10.6034	-1.11597	-2.49545	5.37949	0.00928396	7.09755
贵州	7	1	1	2019	-2.62346	-2.41816	0.515813	-0.663977	10.6857	-1.03637	-2.63388	5.38627	-0.00119885	6.86797
贵州	7	1	1	2020	-2.713	-2.36963	-1.25878	-0.632014	10.7441	-1.13521	-2.80005	5.38883	-0.0107805	7.17931
海南	8	1	0	2011	-2.66558	-2.80164	0.929799	-0.68599	10.2405	-1.15172	-2.12016	5.53517	0.00218873	4.30407
海南	8	1	0	2012	-2.6433	-2.86522	0.847155	-0.674032	10.3415	-1.1183	-2.07335	5.5583	-0.00291395	4.49981
海南	8	1	0	2013	-2.06683	-2.76676	0.666803	-0.648735	10.4357	-1.12539	-2.02412	5.56899	-0.0080428	4.72739
海南	8	1	0	2014	-2.06002	-2.71628	0.671413	-0.628539	10.5231	-1.14301	-1.97091	5.58553	-0.0200511	4.80402
海南	8	1	0	2015	-1.97709	-2.58312	0.70557	-0.599799	10.5892	-1.10288	-1.98246	5.59609	-0.0276604	4.70953
海南	8	1	1	2016	-1.91235	-2.62346	0.585562	-0.567196	10.6692	-1.08906	-2.09187	5.60869	-0.035328	5.14749
海南	8	1	1	2017	-1.86769	-2.713	0.459953	-0.543787	10.75	-1.13613	-2.11314	5.62323	-0.0430549	5.37528
海南	8	1	1	2018	-1.84717	-2.66558	0.436964	-0.525329	10.825	-1.06592	-2.05554	5.63446	0.00455158	5.6204
海南	8	1	1	2019	-1.83493	-2.6433	0.370183	-0.521384	10.8954	-1.05369	-2.09931	5.6474	-0.00457359	5.7301
海南	8	1	1	2020	-1.85244	-2.58973	0.0148886	-0.506331	10.923	-1.03744	-2.29686	5.6644	0.0156524	6.04501
河北	9	1	0	2011	-1.80795	-2.06683	1.31909	-0.785508	10.2971	-1.79929	-2.76368	5.94815	0.00271373	6.0845
河北	9	1	0	2012	-1.82312	-2.06002	1.25219	-0.76357	10.3686	-1.7329	-2.69379	5.95231	0.00473548	6.39192
河北	9	1	0	2013	-1.82858	-1.97709	1.18723	-0.733587	10.4147	-1.70503	-2.64366	5.95583	0.00465102	6.39526
河北	9	1	0	2014	-1.69627	-1.91235	1.10327	-0.706061	10.4489	-1.68448	-2.60337	5.96066	0.00451597	6.5903
河北	9	1	0	2015	-1.5827	-1.86769	1.13494	-0.660294	10.4911	-1.5448	-2.61356	5.9637	-0.00396163	6.96224
河北	9	1	1	2016	-1.47531	-1.84717	1.06333	-0.618621	10.5633	-1.54901	-2.65779	5.96775	0.0102897	7.34666
河北	9	1	1	2017	-1.38084	-1.83493	0.996949	-0.584473	10.6323	-1.52934	-2.63417	5.97237	0.0243407	7.4313
河北	9	1	1	2018	-1.45521	-1.85244	0.965462	-0.556346	10.6876	-1.43646	-2.5427	5.97469	0.0201261	7.69074
河北	9	1	1	2019	-1.61493	-1.80795	0.994732	-0.531565	10.7587	-1.43739	-2.58747	5.9774	0.0174995	7.8071
河北	9	1	1	2020	-1.65043	-1.79163	0.114221	-0.509684	10.7852	-1.38415	-2.65676	5.97972	0.0148661	7.95156
河南	10	1	0	2011	-2.41664	-1.82312	0.912684	-0.904608	10.2364	-1.82364	-3.03671	6.33952	0.0101987	6.59167
河南	10	1	0	2012	-2.47441	-1.82858	0.751888	-0.867738	10.3254	-1.75526	-2.98101	6.347	0.00963315	6.63726
河南	10	1	0	2013	-2.46685	-1.69627	0.660624	-0.830113	10.4077	-1.73458	-2.8862	6.35129	0.0057923	6.94505
河南	10	1	0	2014	-2.45708	-1.5827	0.589452	-0.797398	10.4908	-1.74659	-2.87455	6.35879	0.00268648	7.19893
河南	10	1	0	2015	-2.44824	-1.47531	0.471877	-0.754597	10.5542	-1.69636	-2.87069	6.36458	0.00378702	7.38212
河南	10	1	1	2016	-2.50923	-1.38084	0.370874	-0.717849	10.6292	-1.68638	-2.92571	6.37248	0.00500619	7.71869
河南	10	1	1	2017	-2.63617	-1.45521	0.253091	-0.68201	10.7304	-1.69674	-2.95719	6.37768	0.00622389	8.09163
河南	10	1	1	2018	-2.74006	-1.61493	0.183155	-0.649322	10.834	-1.68961	-2.93367	6.38124	0.0074401	8.27104
河南	10	1	1	2019	-2.73457	-1.65043	-0.0161294	-0.616001	10.9033	-1.6649	-2.93947	6.38498	0.00865483	7.97934
河南	10	1	1	2020	-2.07781	-1.62316	-1.25878	-0.590066	10.9095	-1.6546	-2.97683	6.38903	0.00986809	8.19561
黑龙江	11	1	0	2011	-1.93751	-2.41664	1.07329	-0.571084	10.1694	-1.26856	-2.59467	4.38637	0.00808415	6.09582
黑龙江	11	1	0	2012	-1.81167	-2.47441	1.03532	-0.564232	10.2871	-1.24512	-2.57631	4.37092	0.00383233	6.2691
黑龙江	11	1	0	2013	-1.74323	-2.46685	0.928614	-0.54406	10.3756	-1.25759	-2.56347	4.35522	0.00516345	6.65544
黑龙江	11	1	0	2014	-1.66505	-2.45708	0.902597	-0.523891	10.4182	-1.26525	-2.5219	4.33927	0.00284142	6.85646
黑龙江	11	1	0	2015	-1.60757	-2.44824	0.81093	-0.503016	10.3969	-1.06729	-2.58618	4.31713	0.00892729	7.08003
黑龙江	11	1	1	2016	-1.6545	-2.50923	0.799307	-0.492844	10.4348	-1.03455	-2.66504	4.29825	0.0181162	6.90776
黑龙江	11	1	1	2017	-1.71688	-2.63617	0.767327	-0.479641	10.4881	-0.975708	-2.6139	4.2796	0.00574762	6.88551
黑龙江	11	1	1	2018	-1.68734	-2.74006	0.758467	-0.454767	10.5506	-1.01047	-2.57245	4.25819	0.0108553	7.10824
黑龙江	11	1	1	2019	-2.08463	-2.73457	0.991027	-0.436637	10.6251	-0.994228	-2.68458	4.23631	-0.00949314	7.15227
黑龙江	11	1	1	2020	-2.02558	-2.76236	-0.298406	-0.42141	10.6557	-0.917018	-2.82088	4.21014	-0.0034057	7.12609
湖北	12	1	0	2011	-1.96125	-2.07781	0.740031	-0.658166	10.455	-1.8251	-2.9279	5.73607	0.015294	6.69332
湖北	12	1	0	2012	-1.86943	-1.93751	0.615186	-0.630547	10.5751	-1.79318	-2.83656	5.73971	0.00757205	6.89061
湖北	12	1	0	2013	-1.80037	-1.81167	0.368109	-0.606786	10.6882	-1.75874	-2.76085	5.74264	0.0141123	7.11314
湖北	12	1	0	2014	-1.80894	-1.74323	0.281412	-0.584651	10.7921	-1.74463	-2.71321	5.74574	0.00350951	7.42714
湖北	12	1	0	2015	-1.83078	-1.66505	0.153579	-0.558966	10.8594	-1.59894	-2.67711	5.75157	0.00558214	7.64683
湖北	12	1	1	2016	-1.90803	-1.60757	0.0478373	-0.534949	10.9481	-1.64727	-2.75435	5.75754	0.0047352	8.08425
湖北	12	1	1	2017	-1.86715	-1.6545	-0.0120726	-0.512826	11.0536	-1.70014	-2.80729	5.76076	0.00388754	8.33351
湖北	12	1	1	2018	-2.60712	-1.71688	-0.076881	-0.494296	11.1718	-1.75605	-2.8366	5.76296	0.00954166	8.50755
湖北	12	1	1	2019	-2.62433	-1.68734	-0.168419	-0.480783	11.2478	-1.74044	-2.88761	5.76465	0.00473959	8.49801
湖北	12	1	1	2020	-2.5504	-1.69763	-1.07002	-0.458506	11.2076	-1.62798	-3.10718	5.73343	0.00413695	8.51659
湖南	13	1	0	2011	-2.50145	-2.08463	0.509825	-0.799177	10.2669	-1.68128	-3.02835	5.73888	0.0172007	6.52503
湖南	13	1	0	2012	-2.48504	-2.02558	0.375693	-0.77176	10.3798	-1.63873	-2.94932	5.74025	0.00583053	6.70196
湖南	13	1	0	2013	-2.40439	-1.96125	0.242946	-0.741707	10.483	-1.6133	-2.89722	5.74177	0.00598317	6.94119
湖南	13	1	0	2014	-2.63152	-1.86943	0.119559	-0.713761	10.576	-1.64061	-2.88991	5.74343	0.00449229	7.28276
湖南	13	1	0	2015	-2.70712	-1.80037	0.0487902	-0.677473	10.6726	-1.60577	-2.92761	5.74404	0.00339299	7.47364
湖南	13	1	1	2016	-2.71249	-1.80894	-0.0161294	-0.640556	10.7495	-1.5825	-2.99014	5.74555	0.00464635	7.96867
湖南	13	1	1	2017	-0.471266	-1.83078	-0.0790432	-0.604771	10.8402	-1.59422	-2.95647	5.74676	0.00185178	8.24486
湖南	13	1	1	2018	-0.437088	-1.90803	-0.127833	-0.578213	10.9108	-1.58045	-2.91986	5.74706	0.000178283	8.25713
湖南	13	1	1	2019	-0.464006	-1.86715	-0.218156	-0.554255	11.0038	-1.60249	-2.96257	5.74781	0.00566356	8.37124
湖南	13	1	1	2020	-0.439434	-1.74488	-1.38629	-0.531619	11.0435	-1.59811	-3.00499	5.74861	0.00112336	8.51919
吉林	14	1	0	2011	-0.358047	-2.60712	1.001	-0.627256	10.2496	-1.25646	-2.51701	4.97956	0.0052484	5.3845
吉林	14	1	0	2012	-0.249948	-2.62433	0.8671	-0.606405	10.3736	-1.25609	-2.43448	4.96961	0.00341285	5.62762
吉林	14	1	0	2013	-0.282776	-2.5504	0.741461	-0.584447	10.4671	-1.23396	-2.39868	4.95842	0.00615008	5.71043
吉林	14	1	0	2014	-0.317799	-2.50145	0.677018	-0.565498	10.5331	-1.22996	-2.42208	4.94863	0.00445346	5.9108
吉林	14	1	0	2015	-0.321684	-2.48504	0.500169	-0.551135	10.5487	-1.1359	-2.44696	4.93759	0.0108686	6.11147
吉林	14	1	1	2016	-2.58708	-2.40439	0.436318	-0.531894	10.6031	-1.06734	-2.48025	4.91983	0.0215144	6.3613
吉林	14	1	1	2017	-2.56648	-2.63152	0.417394	-0.515634	10.6664	-1.07552	-2.54857	4.90373	0.000879945	6.6733
吉林	14	1	1	2018	-2.50672	-2.70712	0.442761	-0.496615	10.7127	-1.08845	-2.53527	4.88697	-0.00081559	6.82111
吉林	14	1	1	2019	-2.4277	-2.71249	0.723676	-0.484215	10.7696	-1.09237	-2.68755	4.87237	-0.0147523	7.03527
吉林	14	1	1	2020	-2.25967	-2.65292	-0.512494	-0.467678	10.8309	-1.08842	-2.76485	4.85224	-0.00492147	7.11314
江苏	15	1	0	2011	-2.3003	-0.471266	0.456792	-0.477875	11.0262	-2.06049	-2.47156	6.61796	0.0174755	8.5656
江苏	15	1	0	2012	-2.19483	-0.437088	0.381172	-0.461901	11.1054	-2.03359	-2.41847	6.62997	0.00497495	8.88986
江苏	15	1	0	2013	-2.16774	-0.464006	0.308954	-0.440159	11.195	-2.02951	-2.39344	6.6388	0.00762711	9.09773
江苏	15	1	0	2014	-2.08259	-0.439434	0.216723	-0.42006	11.2735	-2.03496	-2.37901	6.64961	0.00547533	9.25646
江苏	15	1	0	2015	-1.77013	-0.358047	0.177309	-0.393177	11.3606	-1.99543	-2.37768	6.65371	0.00461245	9.38849
江苏	15	1	1	2016	-1.73273	-0.249948	0.118672	-0.372022	11.4367	-2.04757	-2.47166	6.66161	0.0149142	9.57803
江苏	15	1	1	2017	-1.64335	-0.282776	0.00498754	-0.354048	11.5347	-2.09	-2.58344	6.66661	0.00599405	9.81804
江苏	15	1	1	2018	-1.63871	-0.317799	-0.0790432	-0.339796	11.6128	-2.07889	-2.55195	6.66934	0.00250269	9.91472
江苏	15	1	1	2019	-1.68221	-0.321684	-0.131248	-0.321987	11.6669	-2.06005	-2.59836	6.67206	0.00154075	9.82466
江苏	15	1	1	2020	-1.86006	-0.303454	-0.994252	-0.308676	11.7063	-2.01681	-2.62951	6.67303	0.000384033	9.94449
江西	16	1	0	2011	-1.94907	-2.58708	0.704582	-0.781995	10.1631	-1.51963	-2.70187	5.59123	0.00385982	5.36129
江西	16	1	0	2012	-1.99743	-2.56648	0.394067	-0.746647	10.262	-1.44505	-2.57221	5.59145	0.00271669	5.51745
江西	16	1	0	2013	-1.96522	-2.50672	0.361861	-0.71263	10.372	-1.41603	-2.49582	5.59168	0.00157225	5.57215
江西	16	1	0	2014	-2.88375	-2.4277	0.294161	-0.682269	10.4628	-1.39508	-2.4287	5.59257	0.00113313	5.97889
江西	16	1	0	2015	-2.95539	-2.25967	0.273076	-0.648278	10.5304	-1.33579	-2.40349	5.59368	0.00111065	6.34388
江西	16	1	1	2016	-2.79358	-2.3003	0.184818	-0.61645	10.6201	-1.3819	-2.52572	5.59613	0.00108818	6.67708
江西	16	1	1	2017	-2.68608	-2.19483	0.127513	-0.585081	10.7117	-1.37473	-2.59079	5.59946	0.00106571	7.03439
江西	16	1	1	2018	-2.55603	-2.16774	0.0778865	-0.556061	10.8267	-1.38834	-2.61438	5.59991	0.00104323	7.2145
江西	16	1	1	2019	-2.4501	-2.08259	-0.0202027	-0.526459	10.9085	-1.35124	-2.64722	5.60057	0.00102076	7.24137
江西	16	1	1	2020	-2.53855	-2.00287	-1.09961	-0.503572	10.9519	-1.35144	-2.71792	5.60134	0.000998283	7.5606
辽宁	17	1	0	2011	-2.73484	-1.77013	1.17526	-0.445417	10.5282	-1.43205	-2.11404	5.68523	0.00748635	6.98564
辽宁	17	1	0	2012	-2.7039	-1.73273	1.09961	-0.420898	10.6159	-1.36491	-2.04157	5.68432	0.00482263	7.30115
辽宁	17	1	0	2013	-3.58831	-1.64335	0.971915	-0.408563	10.6909	-1.30721	-2.03047	5.68203	0.00592677	7.57302
辽宁	17	1	0	2014	-3.62129	-1.63871	0.92267	-0.399745	10.7345	-1.37161	-2.1509	5.68042	0.00466993	7.30115
辽宁	17	1	0	2015	-3.55472	-1.68221	0.886244	-0.385083	10.7468	-1.50621	-2.50514	5.67582	0.00631986	7.43662
辽宁	17	1	1	2016	-3.45426	-1.86006	1.15247	-0.372951	10.7594	-1.49402	-2.49195	5.67328	-0.00136681	7.71602
辽宁	17	1	1	2017	-3.37791	-1.94907	1.1314	-0.364124	10.8242	-1.49196	-2.48233	5.66981	0.00733187	7.69939
辽宁	17	1	1	2018	-3.55744	-1.99743	1.11481	-0.35292	10.9088	-1.48265	-2.47631	5.66493	0.00367297	7.9338
辽宁	17	1	1	2019	-3.33618	-1.96522	1.2164	-0.339423	10.9685	-1.46472	-2.5558	5.66166	0.000395334	7.83755
辽宁	17	1	1	2020	-3.29114	-1.99819	0.679555	-0.326532	10.979	-1.42521	-2.58856	5.65662	0.0215612	7.8018
内蒙古	18	1	0	2011	-3.29689	-2.88375	1.6607	-0.561338	10.5526	-1.15186	-2.26129	3.03875	-0.0290477	4.57471
内蒙古	18	1	0	2012	-3.48466	-2.95539	1.59838	-0.53756	10.6559	-1.11714	-2.23532	3.03632	0.00577746	4.46591
内蒙古	18	1	0	2013	-3.55778	-2.79358	1.51183	-0.513681	10.7433	-1.12827	-2.23804	3.03266	-0.00718962	5.15906
内蒙古	18	1	0	2014	-3.48018	-2.68608	1.48704	-0.494758	10.8114	-1.14218	-2.27401	3.03021	0.0102933	5.20949
内蒙古	18	1	0	2015	-3.36719	-2.55603	1.47545	-0.476451	10.8775	-1.1134	-2.28282	3.02653	0.0123716	5.4848
内蒙古	18	1	1	2016	-3.28722	-2.4501	1.47064	-0.455592	10.9431	-1.11699	-2.3343	3.02489	0.0123065	5.64191
内蒙古	18	1	1	2017	-3.34737	-2.53855	1.64036	-0.436776	11.0218	-1.19052	-2.44899	3.02366	0.0122415	5.7462
内蒙古	18	1	1	2018	-3.38908	-2.73484	1.70584	-0.422874	11.1048	-1.2062	-2.44498	3.01913	0.0121764	6.24222
内蒙古	18	1	1	2019	-3.23828	-2.7039	1.81401	-0.408432	11.1728	-1.21622	-2.41406	3.01623	0.0121113	6.45362
内蒙古	18	1	1	2020	-3.2394	-2.79027	-0.289016	-0.393258	11.1794	-1.18622	-2.47138	3.01117	0.0120462	6.56526
宁夏	19	1	0	2011	-1.13728	-3.58831	2.11021	-0.689158	10.3143	-1.00674	-2.38934	4.5807	-0.00797789	3.71357
宁夏	19	1	0	2012	-1.09198	-3.62129	2.0743	-0.670423	10.3923	-0.902357	-2.33155	4.59781	0.000729002	4.18965
宁夏	19	1	0	2013	-1.01426	-3.55472	2.04031	-0.637901	10.467	-0.925562	-2.2825	4.60873	0.00138116	5.11199
宁夏	19	1	0	2014	-0.964544	-3.45426	1.99252	-0.60113	10.5137	-0.905362	-2.29079	4.62621	0.0033126	4.74493
宁夏	19	1	0	2015	-0.90411	-3.37791	1.9738	-0.562476	10.5421	-0.817846	-2.30892	4.6342	0.000775212	4.83628
宁夏	19	1	1	2016	-0.851378	-3.55744	1.88464	-0.532034	10.6051	-0.796182	-2.42314	4.65024	0.0141427	5.0626
宁夏	19	1	1	2017	-0.891665	-3.33618	2.00781	-0.495108	10.7302	-0.8464	-2.47145	4.6652	0.0273338	5.31321
宁夏	19	1	1	2018	-0.993522	-3.29114	2.04317	-0.475617	10.812	-0.905681	-2.46534	4.6715	0.0403532	5.84354
宁夏	19	1	1	2019	-1.03312	-3.29689	2.11481	-0.452091	10.8693	-0.957896	-2.63999	4.68187	0.0532053	5.76832
宁夏	19	1	1	2020	-0.992963	-3.35709	0.280657	-0.432352	10.9155	-0.983034	-2.70762	4.68743	0.0658943	6.05209
青海	20	1	0	2011	-1.02192	-3.48466	1.07329	-0.766436	10.0955	-0.348174	-2.43662	2.06253	0.0200519	2.48491
青海	20	1	0	2012	-1.03759	-3.55778	1.12363	-0.737515	10.1976	-0.276673	-2.34373	2.06713	0.0182671	3.55535
青海	20	1	0	2013	-1.10666	-3.48018	1.10625	-0.709297	10.3091	-0.333	-2.2811	2.0678	0.0164792	4.11087
青海	20	1	0	2014	-1.23147	-3.36719	0.955127	-0.67564	10.3803	-0.315753	-2.22645	2.07596	0.0146881	3.97029
青海	20	1	0	2015	-2.59876	-3.28722	0.826804	-0.660506	10.4598	-0.283121	-2.27944	2.07774	0.0128937	4.44265
青海	20	1	1	2016	-2.4725	-3.34737	0.91709	-0.623261	10.5705	-0.3927	-2.54911	2.08641	0.0110962	4.82831
青海	20	1	1	2017	-2.41274	-3.38908	0.854415	-0.59033	10.6504	-0.476681	-2.59526	2.0943	0.00929535	4.91998
青海	20	1	1	2018	-2.37758	-3.23828	0.744315	-0.558459	10.7548	-0.511657	-2.59325	2.09571	0.00749129	5.18178
青海	20	1	1	2019	-2.2328	-3.2394	0.698632	-0.531543	10.8193	-0.456226	-2.69473	2.10101	0.00568397	5.1299
青海	20	1	1	2020	-2.22656	-3.35648	-0.0523465	-0.510078	10.8365	-0.442887	-2.64707	2.10498	0.00387338	5.45959
山东	21	1	0	2011	-2.08134	-1.13728	0.886656	-0.676016	10.6111	-2.05537	-2.70851	6.41562	0.00476198	7.36391
山东	21	1	0	2012	-1.98256	-1.09198	0.880456	-0.653364	10.6998	-1.98449	-2.645	6.42006	0.000996295	7.86057
山东	21	1	0	2013	-1.92066	-1.01426	0.754242	-0.626277	10.7929	-1.95701	-2.59516	6.42397	0.00650361	8.19423
山东	21	1	0	2014	-1.86671	-0.964544	0.75	-0.601998	10.8577	-1.95648	-2.5497	6.43031	0.00548557	8.33974
山东	21	1	0	2015	-1.98404	-0.90411	0.787548	-0.562585	10.9368	-1.90236	-2.57674	6.43621	0.00441453	8.54559
山东	21	1	1	2016	-2.01434	-0.851378	0.760338	-0.525438	10.9893	-1.90385	-2.63543	6.44699	0.032802	8.69651
山东	21	1	1	2017	-1.93438	-0.891665	0.720762	-0.497755	11.0508	-1.9178	-2.65732	6.45299	0.0228747	8.74178
山东	21	1	1	2018	-1.17881	-0.993522	0.659073	-0.486836	11.1017	-1.88681	-2.61063	6.45737	0.0108421	8.81715
山东	21	1	1	2019	-1.12003	-1.03312	0.758467	-0.480228	11.1548	-1.88223	-2.67735	6.46024	0.00415822	8.85338
山东	21	1	1	2020	-1.02338	-1.02887	0.0506931	-0.461224	11.182	-1.86879	-2.72794	6.46601	0.00557911	9.0431
山西	22	1	0	2011	-0.820038	-0.992963	1.88419	-0.697153	10.3266	-1.52796	-2.52421	5.42633	-0.0370062	5.51343
山西	22	1	0	2012	-0.769853	-1.02192	1.85254	-0.666932	10.4001	-1.44311	-2.41392	5.42239	0.00545065	5.83773
山西	22	1	0	2013	-0.639719	-1.03759	1.83306	-0.637058	10.4296	-1.37524	-2.35555	5.41872	0.00543391	6.00389
山西	22	1	0	2014	-0.744047	-1.10666	1.84924	-0.610413	10.4414	-1.36613	-2.36672	5.41674	-0.000304952	6.1717
山西	22	1	0	2015	-0.863089	-1.23147	1.98678	-0.582166	10.4221	-1.24067	-2.41612	5.41418	0.0080058	6.11368
山西	22	1	1	2016	-0.855254	-2.59876	1.95445	-0.557169	10.4333	-1.2482	-2.44442	5.41276	0.0089703	6.38351
山西	22	1	1	2017	-1.90549	-2.4725	1.8329	-0.534392	10.6272	-1.3496	-2.33843	5.41162	0.00993387	6.58617
山西	22	1	1	2018	-1.83495	-2.41274	1.82116	-0.513113	10.7258	-1.3151	-2.27182	5.40934	0.0108965	6.88755
山西	22	1	1	2019	-1.73514	-2.37758	1.85957	-0.489507	10.7887	-1.2811	-2.25229	5.40791	0.0118582	6.8533
山西	22	1	1	2020	-1.63189	-2.47126	-0.401971	-0.469414	10.8406	-1.24983	-2.39508	5.40602	0.012819	7.0184
陕西	23	1	0	2011	-1.57957	-2.2328	1.10922	-0.747451	10.388	-1.42411	-2.56784	5.21016	-0.00411337	7.1333
陕西	23	1	0	2012	-1.59668	-2.22656	1.10294	-0.698708	10.5309	-1.44807	-2.52559	5.21598	-0.000461125	7.47647
陕西	23	1	0	2013	-1.48619	-2.08134	1.04907	-0.662089	10.6432	-1.46781	-2.53853	5.22046	0.00259899	7.57507
陕西	23	1	0	2014	-1.49069	-1.98256	1.01378	-0.634538	10.7279	-1.47974	-2.56717	5.22649	0.00362776	7.51425
陕西	23	1	0	2015	-1.4583	-1.92066	0.98507	-0.602718	10.7505	-1.40858	-2.62984	5.23144	0.00280244	7.25347
陕西	23	1	1	2016	-1.94324	-1.86671	0.929799	-0.572672	10.8065	-1.46766	-2.76087	5.2387	0.0297767	7.45761
陕西	23	1	1	2017	-1.92412	-1.98404	0.838978	-0.543544	10.919	-1.49131	-2.67101	5.24641	0.0139014	8.18116
陕西	23	1	1	2018	-1.82471	-2.01434	0.707543	-0.516608	11.0205	-1.50746	-2.60223	5.2533	0.0100022	8.04495
陕西	23	1	1	2019	-1.72795	-1.93438	0.735728	-0.489668	11.0899	-1.5064	-2.63703	5.2566	0.00145756	8.22013
陕西	23	1	1	2020	-1.65105	-1.87013	-0.759287	-0.46737	11.0954	-1.47856	-2.6978	5.25931	0.0021902	8.25271
上海	24	1	0	2011	-1.5635	-1.17881	0.369492	-0.113125	11.3609	-1.63143	-1.84163	8.22676	9.15557e-05	7.7977
上海	24	1	0	2012	-1.72548	-1.12003	0.305276	-0.113312	11.4033	-1.6277	-1.82735	8.24484	0.000944794	7.9363
上海	24	1	0	2013	-1.83371	-1.02338	0.286682	-0.110001	11.4695	-1.63391	-1.81008	8.26506	0.00235541	8.07589
上海	24	1	0	2014	-1.80697	-0.820038	0.116004	-0.113183	11.5408	-1.6356	-1.79	8.27279	0.00838768	8.14119
上海	24	1	0	2015	-2.84144	-0.769853	0.0554347	-0.12186	11.6008	-1.46846	-1.71098	8.26914	0.00544425	8.39457
上海	24	1	1	2016	-2.95966	-0.639719	-0.0629398	-0.116365	11.7066	-1.46316	-1.67004	8.27279	0.00476998	8.54539
上海	24	1	1	2017	-2.90379	-0.744047	-0.127833	-0.115505	11.8018	-1.473	-1.72514	8.27239	0.00409524	8.73633
上海	24	1	1	2018	-2.80659	-0.863089	-0.208255	-0.115059	11.8898	-1.4614	-1.74567	8.27603	0.00342006	8.90014
上海	24	1	1	2019	-2.75424	-0.855254	-0.331286	-0.113861	11.9401	-1.53565	-1.81009	8.27845	0.00274441	9.08636
上海	24	1	1	2020	-2.80746	-0.871687	-0.765718	-0.11316	11.9627	-1.5705	-1.89757	8.28136	0.00206831	9.22739
四川	25	1	0	2011	-2.88171	-1.90549	0.506818	-0.871014	10.1711	-1.50473	-2.61684	5.11134	0.00972589	6.66696
四川	25	1	0	2012	-2.80448	-1.83495	0.420682	-0.83582	10.2964	-1.47902	-2.57212	5.11394	0.00547237	7.26543
四川	25	1	0	2013	-2.80825	-1.73514	0.346423	-0.799344	10.3967	-1.44991	-2.53422	5.1169	0.00480577	7.47022
四川	25	1	0	2014	-2.33264	-1.63189	0.303801	-0.765621	10.4791	-1.44712	-2.52523	5.12059	0.00165589	7.63723
四川	25	1	0	2015	-2.23081	-1.57957	0.0971267	-0.728413	10.5227	-1.39796	-2.55663	5.12757	0.00767105	8.19506
四川	25	1	1	2016	-2.09553	-1.59668	-0.0120726	-0.693026	10.604	-1.42014	-2.65516	5.13426	0.00829689	8.52496
四川	25	1	1	2017	-1.97488	-1.48619	-0.146183	-0.658177	10.7328	-1.47237	-2.74706	5.13886	0.00892235	8.74034
四川	25	1	1	2018	-1.87591	-1.49069	-0.266573	-0.625429	10.8524	-1.48602	-2.72227	5.14271	0.00924613	8.71276
四川	25	1	1	2019	-1.94409	-1.4583	-0.331286	-0.591337	10.9263	-1.49971	-2.7757	5.14631	0.00496043	8.35796
四川	25	1	1	2020	-1.95902	-1.46371	-0.994252	-0.566803	10.9684	-1.46581	-2.79398	5.14866	0.00443335	8.47178
天津	26	1	0	2011	-1.92406	-1.94324	0.581657	-0.217381	11.0261	-1.50766	-2.08891	7.01885	0.0144421	6.6733
天津	26	1	0	2012	-1.83573	-1.92412	0.457425	-0.203739	11.1052	-1.43969	-2.10164	7.04607	0.00440824	7.01121
天津	26	1	0	2013	-1.13113	-1.82471	0.381172	-0.19517	11.1753	-1.36133	-2.02658	7.06902	0.00475047	7.36265
天津	26	1	0	2014	-1.06858	-1.72795	0.260825	-0.19146	11.2247	-1.30526	-1.968	7.08241	0.00331477	7.35883
天津	26	1	0	2015	-1.00305	-1.65105	0.198031	-0.187477	11.2368	-1.21367	-1.93068	7.08938	0.00136846	7.78904
天津	26	1	1	2016	-0.931862	-1.5635	0.0620354	-0.182737	11.2854	-1.13218	-1.95533	7.09216	0.0557136	8.08487
天津	26	1	1	2017	-0.827021	-1.72548	0.0188218	-0.179772	11.3769	-1.33315	-2.04432	7.06902	0.0025955	7.89096
天津	26	1	1	2018	-0.831066	-1.83371	0.0421012	-0.174973	11.4689	-1.46006	-2.10704	7.04969	0.0159298	7.93987
天津	26	1	1	2019	-0.899009	-1.80697	0.338613	-0.170673	11.5284	-1.37446	-2.15176	7.05113	-0.0104796	7.89804
天津	26	1	1	2020	-0.931272	-1.78976	-0.169603	-0.166236	11.5235	-1.4918	-2.23407	7.05246	0.0265757	7.86634
新疆	27	1	0	2011	-0.795321	-2.84144	1.59919	-0.827138	10.2963	-1.05057	-2.39859	2.61284	-0.00962524	4.85981
新疆	27	1	0	2012	-2.40646	-2.95966	1.61661	-0.81599	10.4074	-1.00242	-2.36129	2.62535	0.00286732	4.82028
新疆	27	1	0	2013	-2.35385	-2.90379	1.63433	-0.799841	10.5183	-1.00661	-2.31809	2.63945	0.00178193	5.10595
新疆	27	1	0	2014	-2.21208	-2.80659	1.64635	-0.759498	10.6014	-1.0269	-2.34521	2.65681	-0.00442459	5.33272
新疆	27	1	0	2015	-2.04579	-2.75424	1.67354	-0.717852	10.5846	-0.894472	-2.37957	2.68228	-0.00239393	5.65249
新疆	27	1	1	2016	-1.92434	-2.80746	1.68176	-0.68478	10.5971	-0.844696	-2.40517	2.70015	0.0335554	5.87774
新疆	27	1	1	2017	-1.95834	-2.88171	1.62334	-0.655851	10.7249	-0.878205	-2.46955	2.72134	0.0129779	5.93489
新疆	27	1	1	2018	-2.00459	-2.80448	1.54926	-0.616002	10.8442	-0.938254	-2.49968	2.73734	0.0089962	6.08222
新疆	27	1	1	2019	-2.02915	-2.80825	1.5023	-0.588608	10.8882	-0.939232	-2.59389	2.7527	0.0112899	6.36303
新疆	27	1	1	2020	-1.93611	-2.84235	0.146694	-0.570586	10.8894	-0.913963	-2.71882	2.76493	0.0295185	6.31716
云南	28	1	0	2011		-2.33264	1.02389	-1.00596	9.93562	-1.17886	-2.37934	4.79218	0.00834809	5.57595
云南	28	1	0	2012		-2.23081	0.913888	-0.955317	10.0855	-1.1334	-2.34477	4.79456	0.0040329	5.88888
云南	28	1	0	2013		-2.09553	0.765468	-0.91656	10.2279	-1.1413	-2.35615	4.79671	0.00784773	6.02345
云南	28	1	0	2014		-1.97488	0.579418	-0.88649	10.3161	-1.15183	-2.43239	4.7993	0.00821532	6.32257
云南	28	1	0	2015		-1.87591	0.419368	-0.845612	10.3771	-1.15509	-2.51431	4.80144	0.0080235	6.55962
云南	28	1	1	2016		-1.94409	0.3257	-0.806546	10.4646	-1.18219	-2.63538	4.80444	0.00517559	6.88038
云南	28	1	1	2017		-1.95902	0.284427	-0.770239	10.583	-1.17427	-2.70688	4.80786	0.00231954	6.9976
云南	28	1	1	2018		-1.92406	0.302324	-0.745706	10.702	-1.23464	-2.68588	4.80998	-0.00161215	7.21671
云南	28	1	1	2019		-1.83573	0.0852598	-0.720109	10.8061	-1.23266	-2.77318	4.81232	0.00948625	7.22839
云南	28	1	1	2020		-1.83957	-0.807436	-0.692406	10.8599	-1.25875	-2.82727	4.81406	0.00367573	7.36708
浙江	29	1	0	2011		-1.13113	0.34359	-0.47324	10.9652	-2.11504	-2.3787	6.26808	0.00631002	7.44717
浙江	29	1	0	2012		-1.06858	0.242946	-0.463586	11.0202	-2.11158	-2.36575	6.28851	0.00492299	7.79934
浙江	29	1	0	2013		-1.00305	0.185649	-0.447303	11.0838	-2.0659	-2.3542	6.30578	0.00150041	7.98378
浙江	29	1	0	2014		-0.931862	0.112435	-0.431436	11.1356	-2.04861	-2.34037	6.32394	0.00402109	8.1682
浙江	29	1	0	2015		-0.827021	0.0610951	-0.410742	11.202	-1.87893	-2.34545	6.33994	0.00147091	8.50613
浙江	29	1	1	2016		-0.831066	-0.0429075	-0.389779	11.2694	-1.91331	-2.34259	6.35437	0.00256949	8.8817
浙江	29	1	1	2017		-0.899009	-0.0888312	-0.372309	11.3576	-1.94003	-2.36145	6.37038	0.00366687	9.10498
浙江	29	1	1	2018		-0.931272	-0.189951	-0.35647	11.4428	-1.9053	-2.34012	6.38694	0.0044187	9.41752
浙江	29	1	1	2019		-0.795321	-0.273122	-0.334404	11.5005	-1.82668	-2.35982	6.40307	0.00276107	9.30828
浙江	29	1	1	2020		-0.825934	-0.83933	-0.326183	11.5203	-1.85884	-2.33513	6.4176	0.00285123	9.5848
重庆	30	1	0	2011		-2.40646	0.58389	-0.598286	10.4592	-1.37457	-2.44519	5.87867	-0.00470429	6.38351
重庆	30	1	0	2012		-2.35385	0.440189	-0.568367	10.5759	-1.33666	-2.48089	5.88896	0.0069866	6.50129
重庆	30	1	0	2013		-2.21208	0.182322	-0.53966	10.6811	-1.44791	-2.46035	5.90104	0.0153123	6.53959
重庆	30	1	0	2014		-2.04579	0.142367	-0.515089	10.7854	-1.4874	-2.43436	5.91176	-0.000192129	6.97635
重庆	30	1	0	2015		-1.92434	-0.0855579	-0.486542	10.8681	-1.44223	-2.40291	5.92044	0.0123673	7.57199
重庆	30	1	1	2016		-1.95834	-0.176737	-0.456734	10.9738	-1.5049	-2.52808	5.93336	0.00714243	7.33759
重庆	30	1	1	2017		-2.00459	-0.236989	-0.430857	11.0693	-1.53202	-2.60948	5.94409	0.0018901	7.40974
重庆	30	1	1	2018		-2.02915	-0.278392	-0.40639	11.1341	-1.55904	-2.60028	5.95032	0.00130865	7.60788
重庆	30	1	1	2019		-1.93611	-0.417032	-0.382209	11.2164	-1.58299	-2.72892	5.9581	0.00601467	7.7803
重庆	30	1	1	2020		-1.87375	-1.43129	-0.364342	11.2682	-1.63253	-2.86235	5.96469	0.0106986	7.86365
